# Supplementary material
Source: HighWire-hosted journal article supplement (https://bmjopen.bmj.com/content/8/3/e020678)
Supplement: inline-supplementary-material-1 [file inline-supplementary-material-1.pdf]

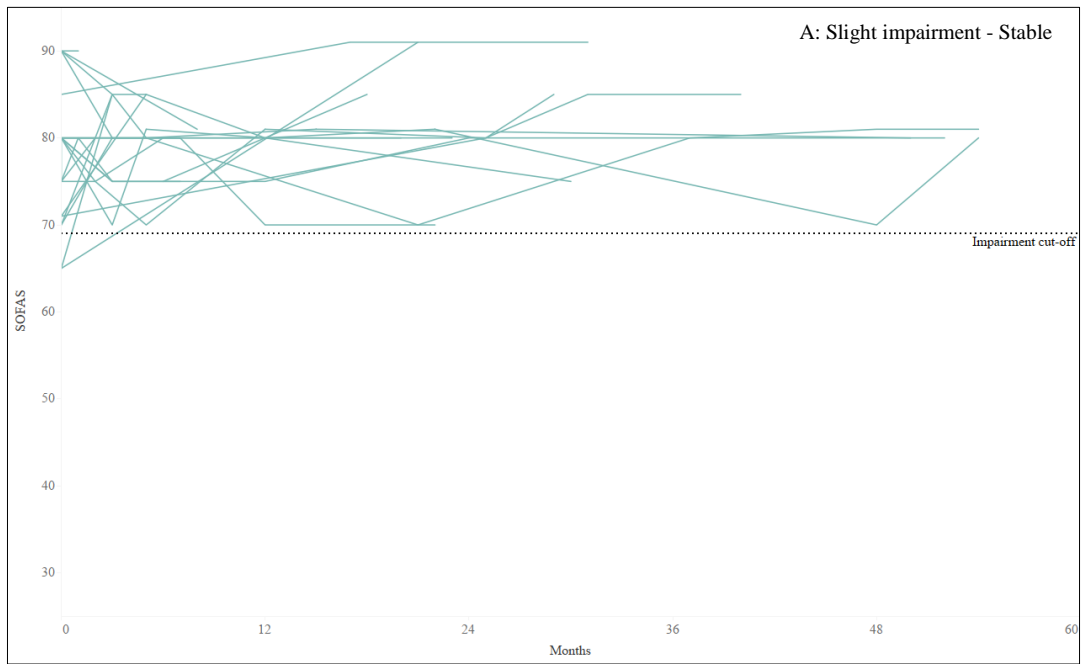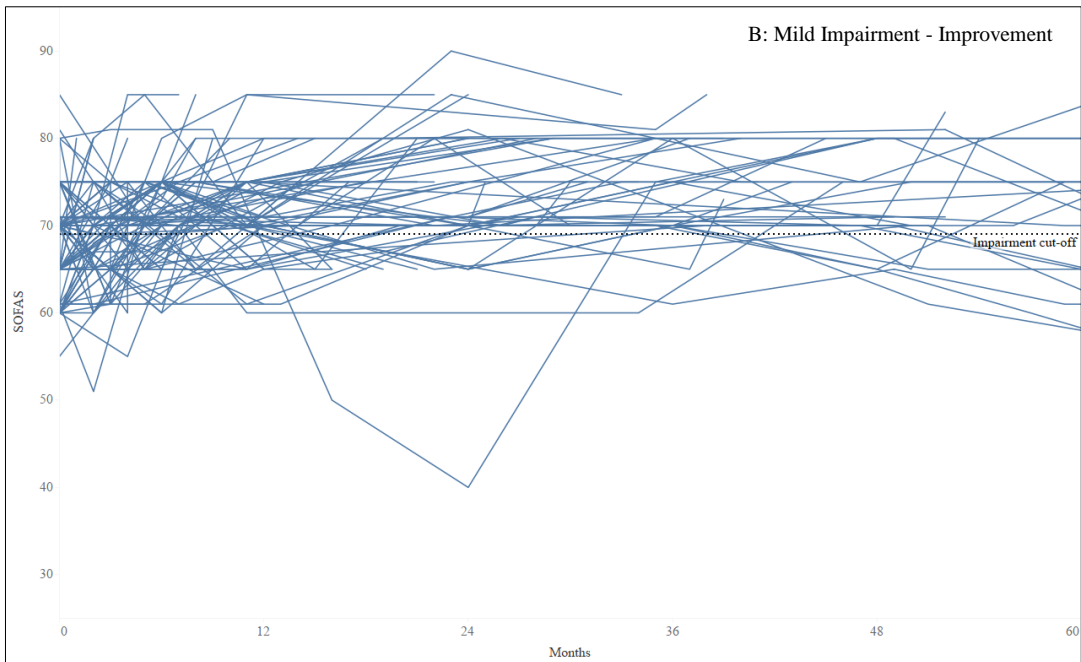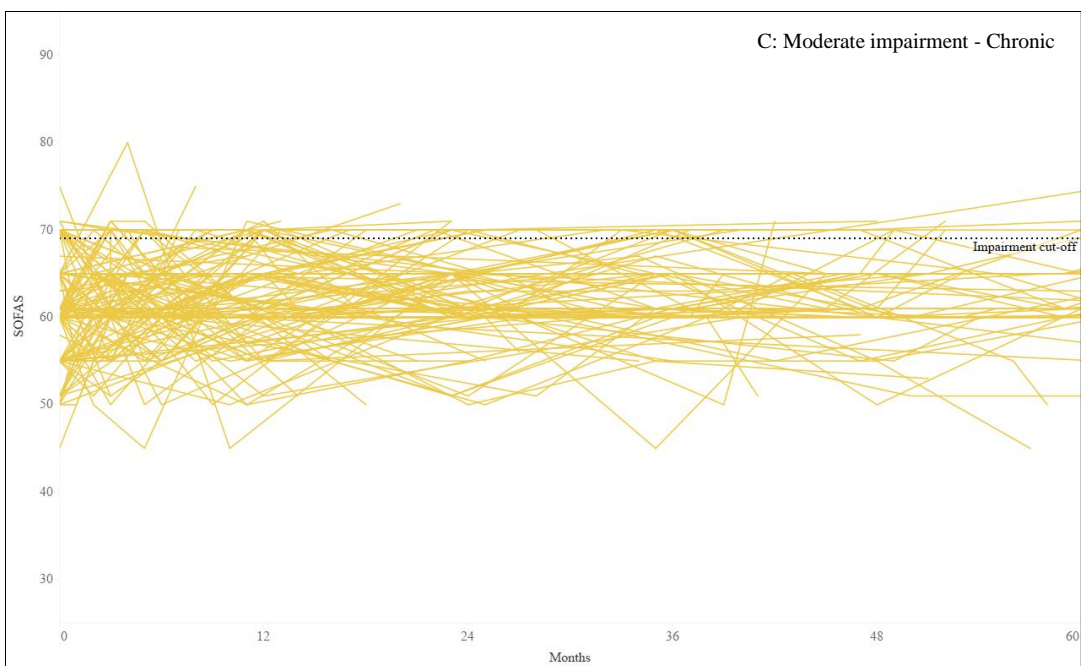

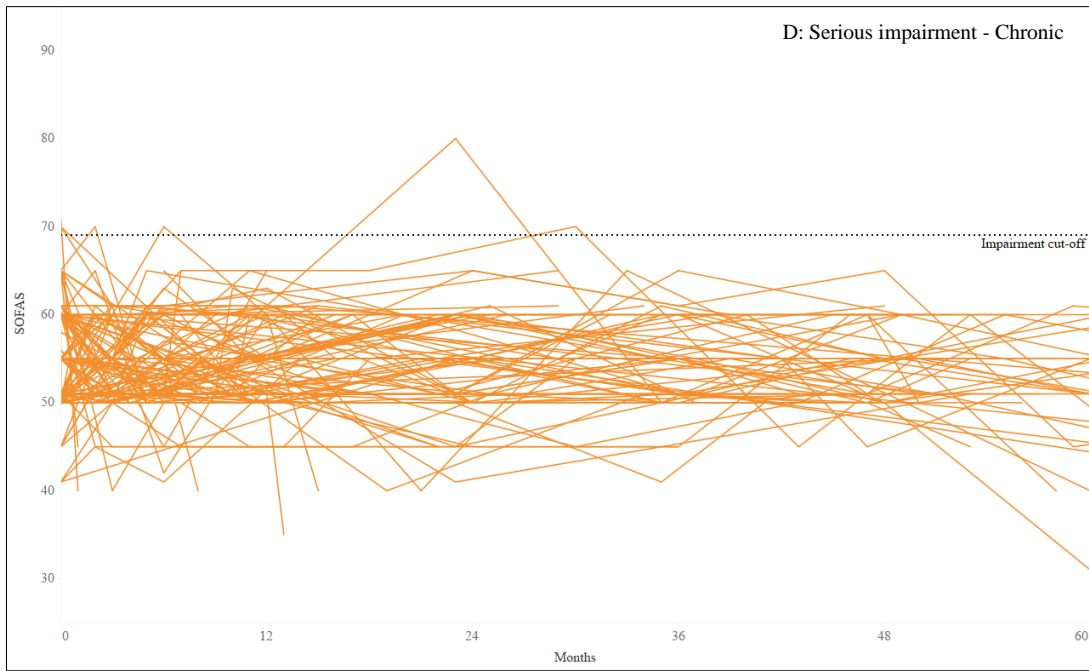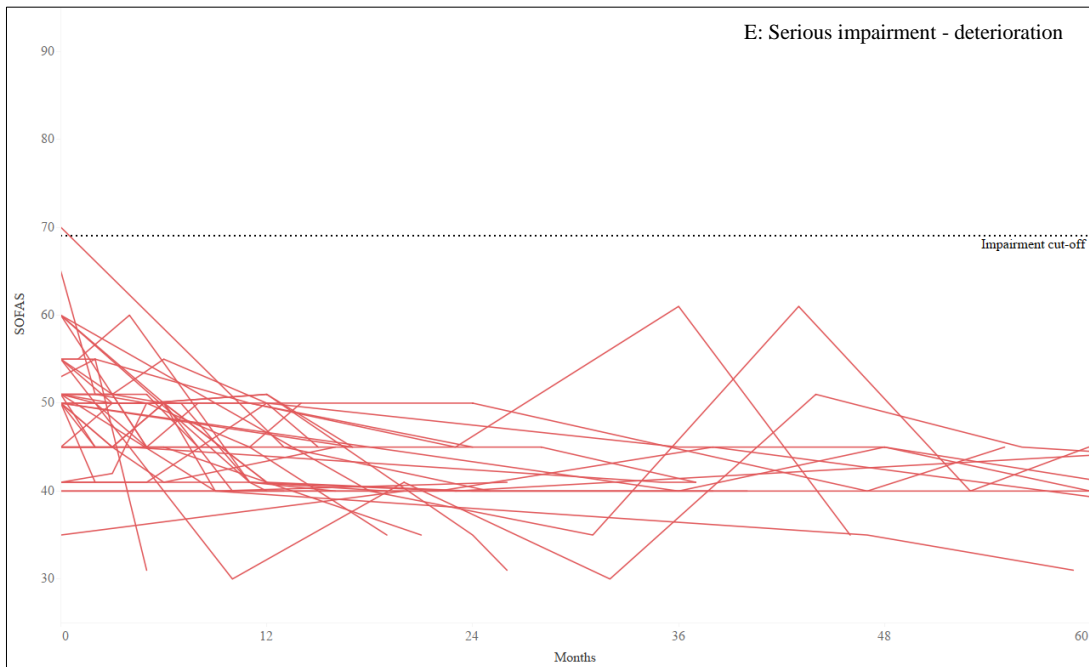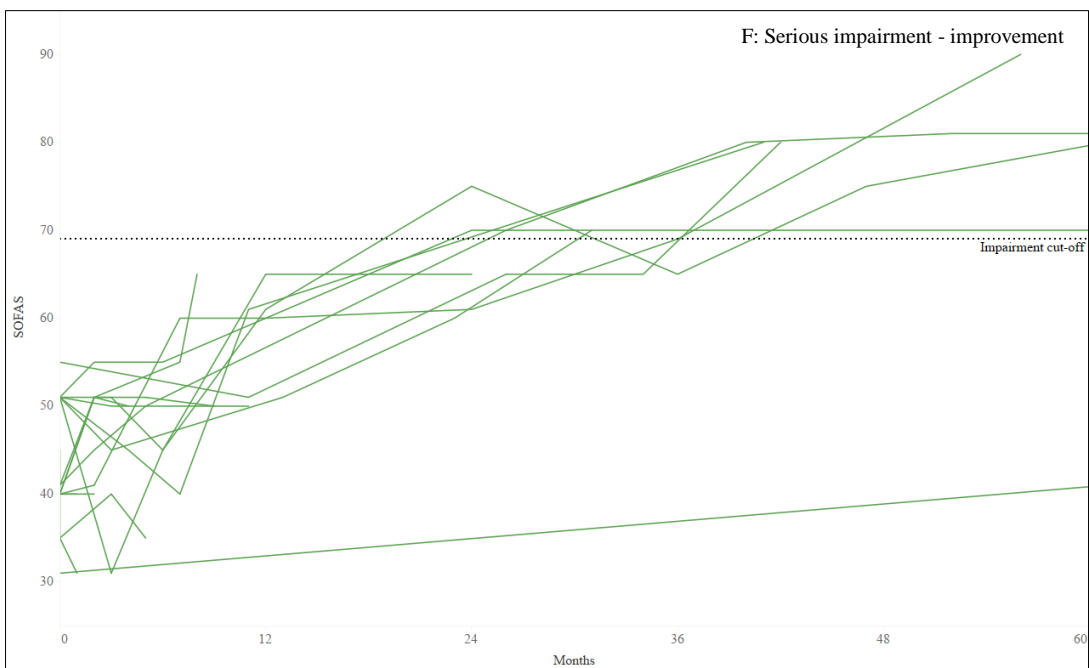

### Supplementary Figure 1 caption

Supplementary figure 1 shows the individual-level trajectories for each group identified and shown in figure 1. Each line represents one individual and their SOFAS score ratings over time. The dotted line represents the clinical impairment cut-off, which is set at a SOFAS score of 69. Panel A: Slight impairment – stable (n=24, 4%), intercept equal to 78 and linear trend over time; Panel B: Mild impairment – improvement (n=129, 23%), intercept equal to 68 and quadratic trend over time; Panel C: Moderate impairment – chronic (n=185, 33%), intercept equal to 61 and linear trend over time; Panel D: Serious impairment – chronic (n=158, 29%), intercept equal to 55 and linear trend over time; Panel E: Serious impairment – improvement (n=19, 4%), intercept equal to 42 and quadratic trend over time; Panel F: Serious impairment – deterioration (n=39, 7%), intercept equal to 51 and quadratic trend over time.
